# Supplementary material for: The impact of humic acid on metaldehyde adsorption onto powdered activated carbon in aqueous solution
Source: Royal Society of Chemistry journal article supplement (doi:10.1039/c8ra06802j), 2018-12-19
Supplement: c8ra06802j1.pdf [file c8ra06802j1.pdf]

1 *Article*

2 **The impact of humic acid on metaldehyde adsorption onto**  
3 **powdered activated carbon in aqueous solution†**

4

5 Journal name: RSC Advances

6

7 **Zhuojun Li<sup>a</sup>, Yuchen Yang<sup>b</sup>, Ulises Jáuregui-Haza<sup>c</sup>, Zhengxiao Guo<sup>b</sup>, Luiza Cintra**  
8 **Campos<sup>a\*</sup>**

9

10

11

12

13

14

15

16

17

18

19

20

21

22

23

24

25

---

<sup>a</sup> Department of Civil, Environmental and Geomatic Engineering, University College London, Gower Street, London WC1E 6BT, UK; Emails: zhuojun.li.09@ucl.ac.uk; l.campos@ucl.ac.uk

<sup>b</sup> Department of Chemistry, University College London, Gower Street, London WC1E 6BT, UK; Email: yu.yang.13@ucl.ac.uk; x.guo@ucl.ac.uk

<sup>c</sup> Instituto Superior de Tecnologías y Ciencias Aplicadas (InSTEC), Universidad de La Habana, La Habana, CP 10600, Cuba; Email: ulises.jauregui@infomed.sld.cu

\* Author to whom correspondence should be addressed; Email: l.campos@ucl.ac.uk (L.C.C.); Tel.: +44-207-679-4162 (L.C.C)

† Electronic supplementary information (ESI) available.

26 **Adsorption experiment:**

27 For single adsorption of metaldehyde, three experiments were done: 1) PAC dosage was varied  
28 from 0.005g to 0.5 g using 500 mL of 1 mg L<sup>-1</sup> metaldehyde solution without adjusting the pH  
29 of the solution for a 2-hour reaction time; 2) sample solutions were taken at different time  
30 intervals between 0 minutes and 2 hours using 500 mL of 1 mg L<sup>-1</sup> metaldehyde solution and  
31 0.05 g PAC without adjusting the pH of the solution; 3) pH of metaldehyde solution was varied  
32 from 4 to 12 using 500 mL of metaldehyde solution and 0.05 g PAC for a 2-hour reaction time.

33 For single adsorption of HA, two experiments were done: 1) PAC dosage was varied from 0.05  
34 g to 1 g using 500 mL of 30 mg L<sup>-1</sup> HA solution without adjusting the pH of the solution for  
35 the 2-hour reaction time; 2) the sample solutions were taken at different time intervals between  
36 0 minutes and 30 days using 500 mL of 30 mg L<sup>-1</sup> HA solution without adjusting the pH of the  
37 solution and 0.25 g PAC.

38 For binary adsorption of metaldehyde and HA, two experiments were done: 1) for the 500 mL  
39 multi-component solution containing metaldehyde and HA, the concentration of HA in the  
40 binary system was varied from 3 mg L<sup>-1</sup> to 90 mg L<sup>-1</sup> and the concentration of metaldehyde  
41 was fixed at 1 mg L<sup>-1</sup> without adjusting the pH of the solution using 0.05 g PAC for a 2-hour  
42 reaction time; 2) sample solutions were taken at different time intervals between 0 minutes to  
43 2 hours using 500 mL of multi-component solution containing 1 mg L<sup>-1</sup> metaldehyde and 30  
44 mg L<sup>-1</sup> HA without adjusting the pH of the solution and 0.05 g PAC.

45

46

47

48

49

50

51

52

53

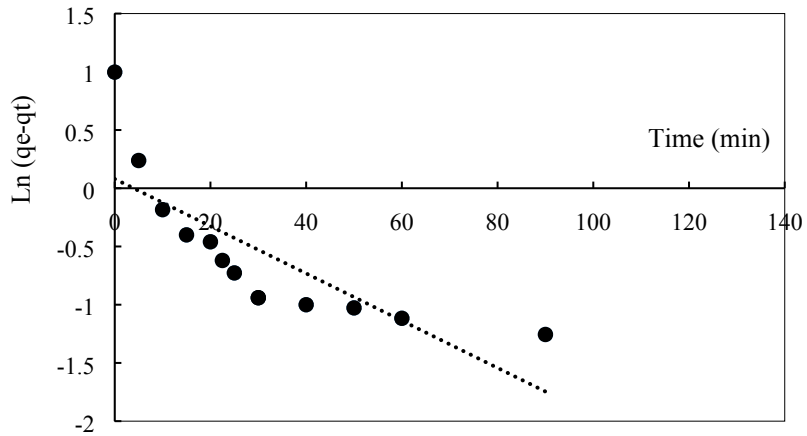

54

55 Figure 1. Pseudo-first order kinetic model fitting of 1 mg L<sup>-1</sup> metaldehyde with 0.05g PAC in  
 56 2-hour batch experiment in single system

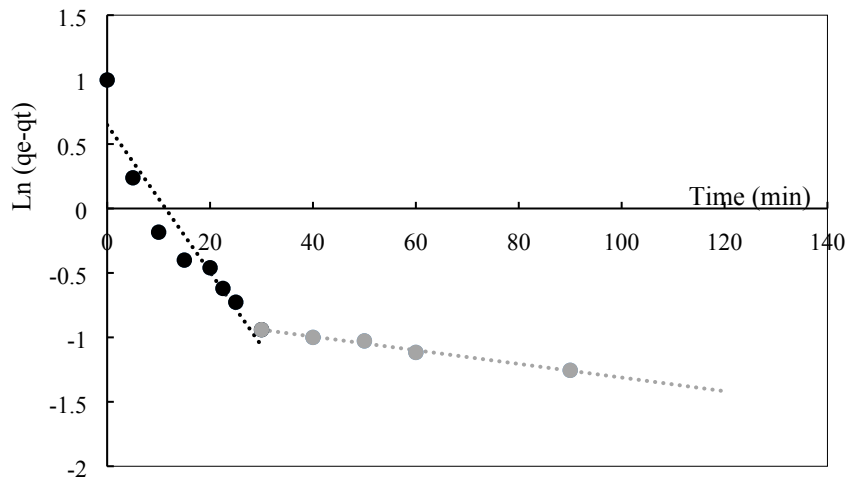

57

58 Figure 2. Two gradients plotting of pseudo-first order kinetic model

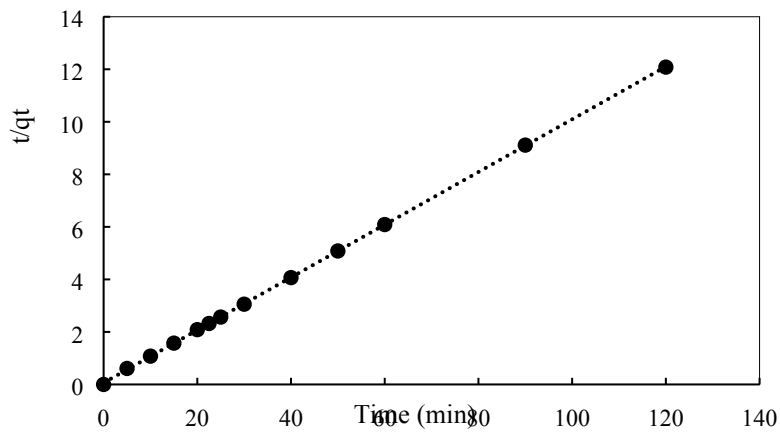

59

60 Figure 3. Pseudo-second order kinetic model fitting of  $1 \text{ mg L}^{-1}$  metaldehyde with  $0.05 \text{ g PAC}$   
61 in 2-hour batch experiment in single system

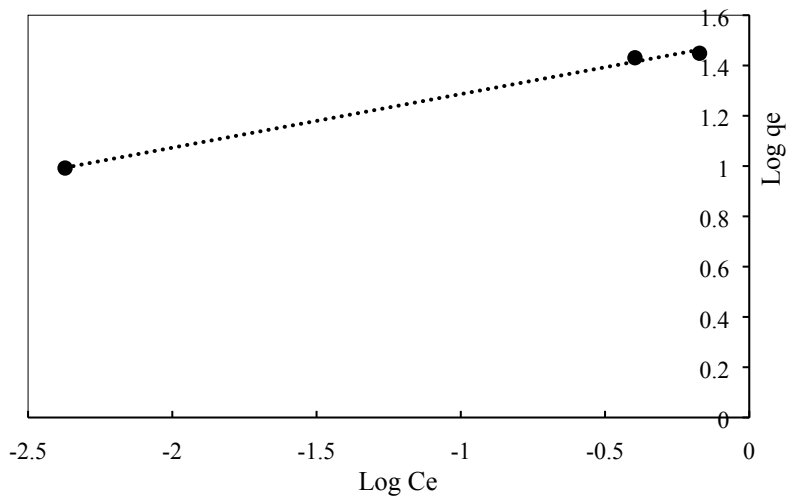

62

63 Figure 4. Freundlich isotherm fitting for single adsorption of metaldehyde

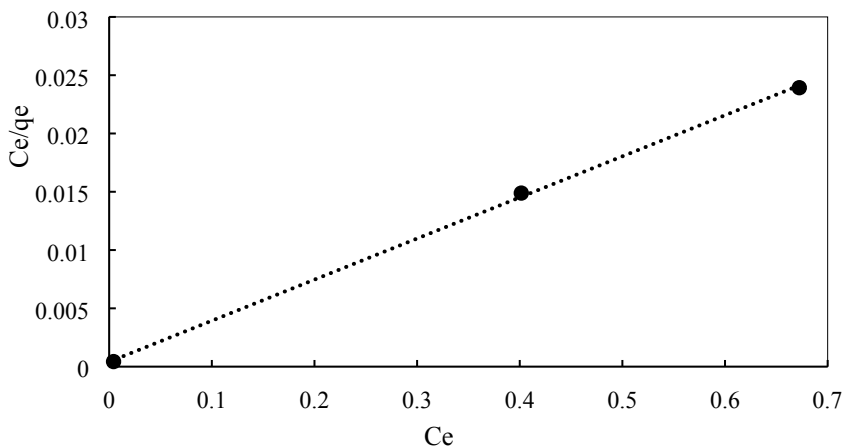

64

65 Figure 5. Langmuir isotherm fitting for single adsorption of metaldehyde

66

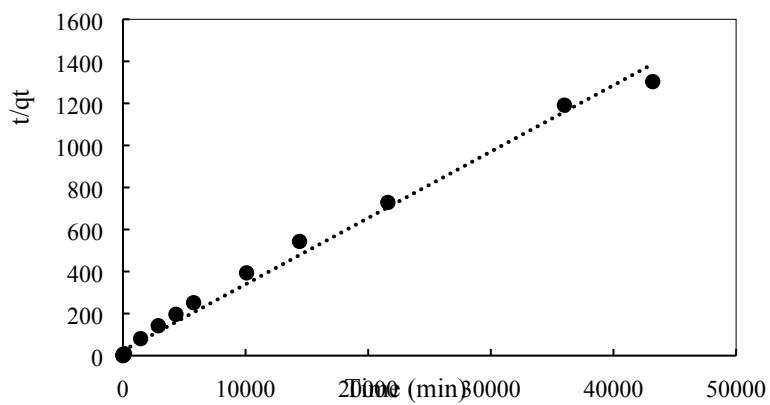

67

68 Figure 6. Pseudo-second order kinetic fitting of  $30 \text{ mg L}^{-1}$  metaldehyde with  $0.25\text{g}$  PAC in 2-  
69 hour batch experiment in single system

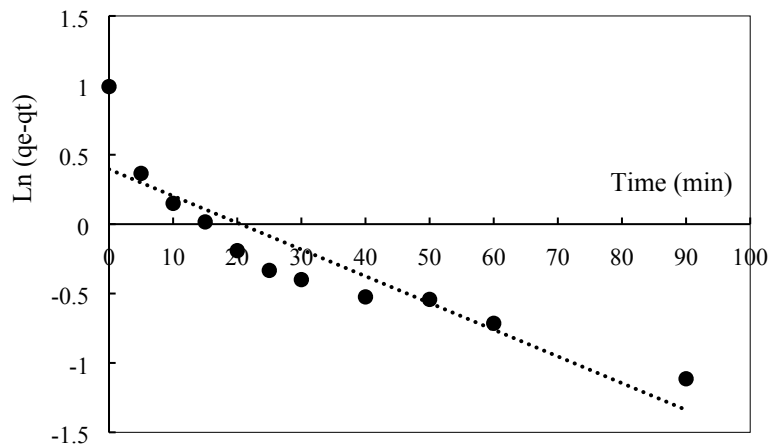

70

71 Figure 7. Pseudo-first order kinetic model fitting for metaldehyde in binary system ( $1 \text{ mg L}^{-1}$   
72 metaldehyde and  $30 \text{ mg L}^{-1}$  HA) with  $0.05\text{g}$  PAC in 2-hour batch experiment

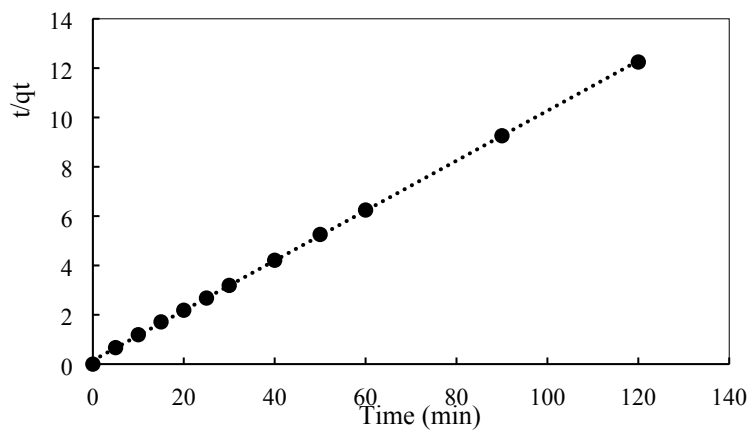

73

74 Figure 8. Pseudo-second order kinetic model fitting for metaldehyde in binary system ( $1 \text{ mg L}^{-1}$   
75  $\text{L}^{-1}$  metaldehyde and  $30 \text{ mg L}^{-1}$  HA) with  $0.05\text{g}$  PAC in 2-hour batch experiment

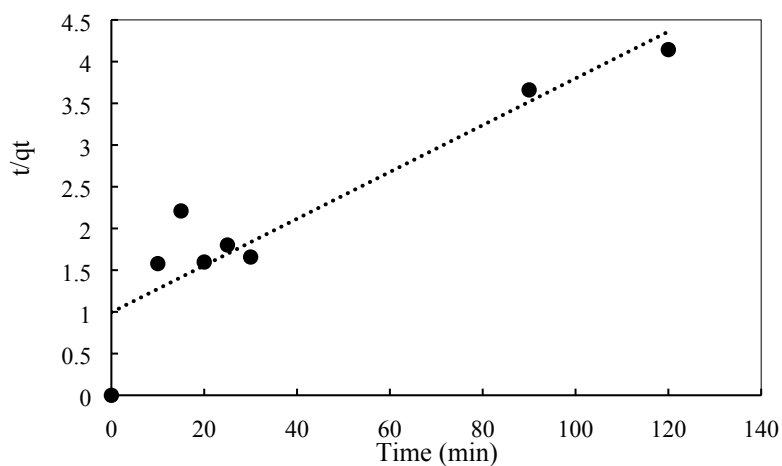

76

77 Figure 9. Pseudo-second order kinetic model fitting for HA of in binary system ( $1 \text{ mg L}^{-1}$   
78 metaldehyde and  $30 \text{ mg L}^{-1}$  HA) with  $0.05\text{g}$  PAC in 2-hour batch experiment

80 Table 1. Removal of metaldehyde and HA under different experiment conditions (*p* values are  
 81 from ANOVA single-factor statistic test for analysing concentrations of solutions before and

|                                 | Percentage removal (%) | Initial concentration (mg L <sup>-1</sup> ) |     | PAC dosage (g L <sup>-1</sup> ) | <i>p</i> value         |
|---------------------------------|------------------------|---------------------------------------------|-----|---------------------------------|------------------------|
|                                 |                        | Metaldehyde                                 | HA  |                                 |                        |
| Removal of metaldehyde (single) | 30.3 ± 6.4             | 1                                           |     | 0.01                            | 2.28×10 <sup>-7</sup>  |
|                                 | 57.8 ± 2.7             | 1                                           |     | 0.02                            | 1.07×10 <sup>-9</sup>  |
|                                 | 99.6 ± 0.0             | 1                                           | n/a | 0.1                             | 4.07×10 <sup>-12</sup> |
|                                 | 100.0 ± 0.0            | 1                                           |     | 0.2                             | 8.24×10 <sup>-16</sup> |
|                                 | 100.0 ± 0.0            | 1                                           |     | 1                               | 1.45×10 <sup>-12</sup> |
| Removal of HA (single)          | 9.8 ± 0.1              |                                             | 30  | 0.1                             | 8.5×10 <sup>-10</sup>  |
|                                 | 14.8 ± 0.1             |                                             | 30  | 0.2                             | 6.96×10 <sup>-11</sup> |
|                                 | 21.6 ± 0               | n/a                                         | 30  | 0.5                             | 6.72×10 <sup>-11</sup> |
|                                 | 25.1 ± 0.1             |                                             | 30  | 1                               | 1.39×10 <sup>-12</sup> |
|                                 | 32.0 ± 0.1             |                                             | 30  | 2                               | 9.8×10 <sup>-11</sup>  |
| Removal of metaldehyde (binary) | 98.6 ± 0.2             | 1                                           | 3   | 0.1                             | 1.24×10 <sup>-18</sup> |
|                                 | 98.4 ± 0.3             | 1                                           | 9   | 0.1                             | 8.48×10 <sup>-16</sup> |
|                                 | 97.8 ± 0.5             | 1                                           | 15  | 0.1                             | 2.53×10 <sup>-18</sup> |
|                                 | 96.2 ± 0.5             | 1                                           | 30  | 0.1                             | 1.37×10 <sup>-18</sup> |
|                                 | 89.9 ± 1.4             | 1                                           | 60  | 0.1                             | 9.76×10 <sup>-16</sup> |
|                                 | 90.2 ± 1.0             | 1                                           | 90  | 0.1                             | 1.31×10 <sup>-14</sup> |
| Removal of HA (binary)          | 20.5 ± 0.5             | 1                                           | 3   | 0.1                             | 1.98×10 <sup>-7</sup>  |
|                                 | 16.3 ± 0.4             | 1                                           | 9   | 0.1                             | 2.71×10 <sup>-7</sup>  |
|                                 | 14.8 ± 0               | 1                                           | 15  | 0.1                             | 6.53×10 <sup>-11</sup> |
|                                 | 11.3 ± 1.6             | 1                                           | 30  | 0.1                             | 1.11×10 <sup>-10</sup> |
|                                 | 7.7 ± 0                | 1                                           | 60  | 0.1                             | 1.34×10 <sup>-10</sup> |
|                                 | 6.5 ± 0                | 1                                           | 90  | 0.1                             | 8.73×10 <sup>-10</sup> |

82 after treatments)

83

84

85

86

87

88

89

90

91

92

93

94

95 Table 2. Comparison table of adsorption of metaldehyde and HA onto GAC and PAC

| Sample solution (500 mL)                                                                           | 2 g/L GAC (purchased from sigma-aldrich, 20 mesh size, specific surface area = 650 m <sup>2</sup> g <sup>-1</sup> ) |       | 0.1 g/L PAC (used in this study, specific surface area = 962 m <sup>2</sup> g <sup>-1</sup> ) |            | 0.2 g/L PAC ( used in this study, specific surface area = 962 m <sup>2</sup> g <sup>-1</sup> ) |            |
|----------------------------------------------------------------------------------------------------|---------------------------------------------------------------------------------------------------------------------|-------|-----------------------------------------------------------------------------------------------|------------|------------------------------------------------------------------------------------------------|------------|
|                                                                                                    | Removal (%)                                                                                                         |       | Removal (%)                                                                                   |            | Removal (%)                                                                                    |            |
|                                                                                                    | Metaldehyde                                                                                                         | HA    | Metaldehyde                                                                                   | HA         | Metaldehyde                                                                                    | HA         |
| <b>Mono-component solution of metaldehyde (1 mg L<sup>-1</sup>)</b>                                | 99.70±0.15                                                                                                          |       | 99.6                                                                                          |            | 100                                                                                            |            |
| <b>Multi-component solution of metaldehyde (1 mg L<sup>-1</sup>) and HA (30 mg L<sup>-1</sup>)</b> | 98.99±0.58                                                                                                          | 21.56 | 96.2±0.5                                                                                      | 11.3 ± 1.6 |                                                                                                |            |
|                                                                                                    | $k_2 = 0.016 \text{ g mg}^{-1} \text{ min}^{-1}$                                                                    |       | $k_2 = 0.069 \text{ g mg}^{-1} \text{ min}^{-1}$                                              |            |                                                                                                |            |
| <b>Mono-component solution of HA (30 mg L<sup>-1</sup>)</b>                                        |                                                                                                                     | 22.67 |                                                                                               | 9.8 ± 0.1  |                                                                                                | 14.8 ± 0.1 |

96
